# Supplementary material for: The effect of insecticide synergist treatment on genome-wide gene expression in a polyphagous pest
Source: PubMed Central journal article supplement (PMC5647426; doi:10.1038/s41598-017-13397-x), 2017-10-18
Supplement: 41598_2017_13397_MOESM1_ESM.pdf [file 41598_2017_13397_MOESM1_ESM.pdf]

## Supplementary information

# The effect of insecticide synergist treatment on genome-wide gene expression in a polyphagous pest

Simon Snoeck<sup>1</sup>, Robert Greenhalgh<sup>2</sup>, Luc Tirry<sup>1</sup>, Richard M. Clark<sup>2,3</sup>, Thomas Van Leeuwen<sup>1,4,\*</sup> and Wannes Dermauw<sup>1,\*</sup>

### Affiliation

<sup>1</sup>Laboratory of Agrozoology, Department of Crop Protection, Faculty of Bioscience Engineering, Ghent University, Coupure links 653, 9000 Ghent, Belgium

<sup>2</sup>Department of Biology, University of Utah, 257 South 1400 East, Salt Lake City, Utah 84112, USA

<sup>3</sup>Center for Cell and Genome Science, University of Utah, 257 South 1400 East, Salt Lake City, Utah 84112, USA

<sup>4</sup>Institute for Biodiversity and Ecosystem Dynamics (IBED), University of Amsterdam (UvA), Science Park 904, 1908 XH, Amsterdam, The Netherlands

\*corresponding authors:

[thomas.vanleeuwen@ugent.be](mailto:thomas.vanleeuwen@ugent.be)

[wannes.dermauw@ugent.be](mailto:wannes.dermauw@ugent.be)

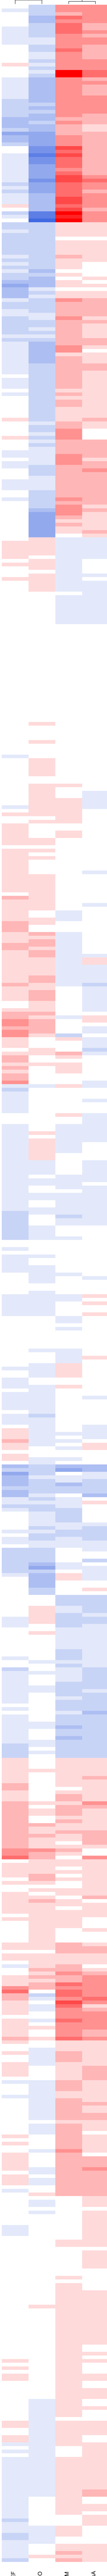

tetur01g00340  
tetur01g01340  
tetur08g03420  
tetur10g02960  
tetur02g11810  
tetur09g05530  
tetur04g00960  
tetur03g05250  
tetur01g02110  
tetur03g04210  
tetur17g03630  
tetur02g13610  
tetur04g05720  
tetur10g04580  
tetur02g06230  
tetur01g01500  
tetur09g02570  
tetur11g04120  
tetur16g00410  
tetur09g03450  
tetur04g02850  
tetur21g00740  
tetur31g00360  
tetur31g00520  
tetur19g06240  
tetur02g00320  
tetur02g00810  
tetur37g00770  
tetur29g02160  
tetur02g03520  
tetur31g00760  
tetur27g02400  
tetur01g13540  
tetur09g03970  
tetur08g00050  
tetur20g01640  
tetur4g00520  
tetur29g03290  
tetur29g00490  
tetur02g00620  
tetur05g03220  
tetur02g06230  
tetur24g01230  
tetur29g00680  
tetur02g13400  
tetur29g14180  
tetur10g02500  
tetur24g02450  
tetur39g04660  
tetur19g06390  
tetur03g03900  
tetur13g00150  
tetur18g00370  
tetur16g00360  
tetur11g00180  
tetur09g02480  
tetur04g03290  
tetur27g01570  
tetur08g01250  
tetur04g07490  
tetur10g04590  
tetur11g00650  
tetur21g02570  
tetur01g09330  
tetur10g09570  
tetur19g01140  
tetur04g03800  
tetur01g03140  
tetur10g00620  
tetur10g01950  
tetur33g01070  
tetur16g01640  
tetur01g01600  
tetur01g19400  
tetur09g00210  
tetur05g00810  
tetur05g03880  
tetur09g02220  
tetur29g00090  
tetur03g05370  
tetur18g00290  
tetur04g04380  
tetur04g07190  
tetur19g05790  
tetur08g00370  
tetur22g01850  
tetur41g00270  
tetur01g10030  
tetur12g02900  
tetur29g00750  
tetur16g02020  
tetur39g03560  
tetur08g03750  
tetur11g02610  
tetur10g01220  
tetur05g00370  
tetur08g00580  
tetur10g03890  
tetur27g01250  
tetur16g00680  
tetur10g02600  
tetur29g02740  
tetur06g04220  
tetur04g02700  
tetur05g08170  
tetur13g02970  
tetur18g02630  
tetur15g00080  
tetur39g01950  
tetur10g02740  
tetur17g03260  
tetur39g02520  
tetur26g00100  
tetur02g11090  
tetur06g03930  
tetur02g03520  
tetur01g01570  
tetur16g02430  
tetur09g07650  
tetur01g00200  
tetur03g00450  
tetur10g04010  
tetur01g03180  
tetur02g04120  
tetur29g01980  
tetur08g00400  
tetur13g002170  
tetur09g00290  
tetur27g001290  
tetur36g00810  
tetur37g00390  
tetur03g05960  
tetur21g05200  
tetur16g00870  
tetur09g01430  
tetur39g00460  
tetur29g02210  
tetur32g00350  
tetur33g00330  
tetur01g01250  
tetur15g01030  
tetur12g02830  
tetur16g00060  
tetur01g02810  
tetur04g02840  
tetur09g00050  
tetur21g02040  
tetur09g00890  
tetur08g06590  
tetur01g02080  
tetur14g02380  
tetur09g00380  
tetur02g02740  
tetur18g00500  
tetur04g00360  
tetur08g07610  
tetur14g02510  
tetur15g00420  
tetur09g07100  
tetur15g02650  
tetur29g01340  
tetur10g02530  
tetur16g02470  
tetur01g03550  
tetur15g00370  
tetur01g09170  
tetur20g03420  
tetur03g04230  
tetur02g01890  
tetur09g05740  
tetur12g02560  
tetur29g02350  
tetur01g14340  
tetur02g11520  
tetur27g00570  
tetur09g02520  
tetur17g02070  
tetur01g02830  
tetur10g02670  
tetur29g06400  
tetur09g03870  
tetur23g00890  
tetur32g00040  
tetur08g02740  
tetur10g06710  
tetur22g00950  
tetur02g06110  
tetur03g07390  
tetur08g05600  
tetur19g04270  
tetur02g10890  
tetur11g00590  
tetur29g01090  
tetur39g01950  
tetur19g00040  
tetur30g00270  
tetur19g03100  
tetur39g00850  
tetur02g08250  
tetur03g01330  
tetur06g01600  
tetur29g02440  
tetur29g01140  
tetur01g05560  
tetur10g03670  
tetur01g02870  
tetur20g00230  
tetur09g01470  
tetur15g03820  
tetur08g03240  
tetur25g00500  
tetur26g00990  
tetur01g13990  
tetur04g06160  
tetur02g01110  
tetur18g00570  
tetur39g02370  
tetur01g05240  
tetur07g07510  
tetur11g01350  
tetur03g08730  
tetur09g06190  
tetur35g00490  
tetur16g01780  
tetur03g00710  
tetur13g01320  
tetur01g10330  
tetur11g03520  
tetur08g06930  
tetur29g01760  
tetur02g05060  
tetur29g00890  
tetur29g01530  
tetur02g00010  
tetur31g01190  
tetur29g01780  
tetur03g08120  
tetur36g00260  
tetur09g04050  
tetur39g01000  
tetur17g02150  
tetur05g09319  
tetur02g13520  
tetur09g02290  
tetur09g05750  
tetur27g02180  
tetur11g02100  
tetur09g01290  
tetur20g02520  
tetur04g02140  
tetur15g03470  
tetur29g03210  
tetur14g01900  
tetur26g01270  
tetur09g00850  
tetur03g01440  
tetur01g15420  
tetur13g04500  
tetur31g01300  
tetur09g02860  
tetur12g02770  
tetur26g01850  
tetur01g06490  
tetur19g02460  
tetur08g00850  
tetur01g02700  
tetur28g00490  
tetur13g02140  
tetur14g01820  
tetur17g02530  
tetur01g14630  
tetur16g00010  
tetur02g01920  
tetur09g00330  
tetur01g02790  
tetur15g01940  
tetur04g01940  
tetur17g03470  
tetur01g09560  
tetur02g10610  
tetur29g02220  
tetur10g03640  
tetur20g02400  
tetur01g16300  
tetur16g01500  
tetur02g02000  
tetur25g01160  
tetur36g00480  
tetur01g16130  
tetur06g01500  
tetur02g09640  
tetur02g05030  
tetur09g06960  
tetur29g05850  
tetur31g01930  
tetur01g02740  
tetur15g02870  
tetur17g01980  
tetur08g07770  
tetur12g02740  
tetur03g01290  
tetur08g05920  
tetur01g14910  
tetur02g05780  
tetur06g05340  
tetur10g05220  
tetur29g00030  
tetur14g02160  
tetur13g03690  
tetur39g02450  
tetur15g00620  
tetur01g02760  
tetur05g08580  
tetur29g02570  
tetur12g02850  
tetur01g05420  
tetur19g03130  
tetur15g00060  
tetur02g00200  
tetur19g04370  
tetur24g00580  
tetur01g07180  
tetur02g11920  
tetur07g04480  
tetur19g03280  
tetur01g09150  
tetur12g02860  
tetur02g06080  
tetur09g04810  
tetur02g08340  
tetur03g02550  
tetur03g04940  
tetur19g04400  
tetur09g05570  
tetur05g02800  
tetur09g05770  
tetur39g02030  
tetur01g07680  
tetur15g01820  
tetur18g00250  
tetur49g02850  
tetur39g05600  
tetur14g03050  
tetur07g05370  
tetur39g04100  
tetur22g02320  
tetur28g00880  
tetur01g01330  
tetur01g11490  
tetur01g10870  
tetur04g02670  
tetur09g04760  
tetur05g01540  
tetur29g08250  
tetur02g14220  
tetur01g11400  
tetur01g08650  
tetur39g01440  
tetur06g01440  
tetur30g00510  
tetur11g03380  
tetur39g01760  
tetur03g03800  
tetur03g00490  
tetur07g01800  
tetur04g06670  
tetur09g01540  
tetur08g01650  
tetur08g00020  
tetur06g00030  
tetur01g09220  
tetur03g01740  
tetur09g00470  
tetur30g02190  
tetur02g01990  
tetur17g00780  
tetur18g02470  
tetur19g02470  
tetur04g00040  
tetur32g00030  
tetur41g00430  
tetur06g08200  
tetur09g02500  
tetur05g01870  
tetur19g03960  
tetur08g06220  
tetur27g01060  
tetur03g07550  
tetur04g02260  
tetur18g01560  
tetur10g04920  
tetur15g00400  
tetur49g00450  
tetur02g02800  
tetur18g00580  
tetur35g00510  
tetur29g00310  
tetur29g03290  
tetur34g01010  
tetur01g09690  
tetur19g01960  
tetur29g01270  
tetur09g00490  
tetur01g14350  
tetur30g00430  
tetur07g04930  
tetur39g01210  
tetur35g00480  
tetur05g05490  
tetur27g02160  
tetur09g05420  
tetur02g05940  
tetur10g04610  
tetur09g04370  
tetur07g00280  
tetur14g02180  
tetur23g01040  
tetur03g01510  
tetur21g00240  
tetur32g00910  
tetur01g00260  
tetur30g00060  
tetur19g03360  
tetur01g00890  
tetur30g01540  
tetur07g04810  
tetur01g09970  
tetur17g02570  
tetur10g04050  
tetur29g01000  
tetur19g02310  
tetur04g09130  
tetur07g01840  
tetur10g03360  
tetur01g08230  
tetur07g02030  
tetur13g04490  
tetur09g00560  
tetur01g13840  
tetur08g02780  
tetur02g10540  
tetur09g07330  
tetur01g16120  
tetur04g08320  
tetur04g00890  
tetur03g02860  
tetur19g00290  
tetur01g02570  
tetur18g03070  
tetur19g00260  
tetur29g01910  
tetur14g02130  
tetur03g03610  
tetur08g08300  
tetur08g03870  
tetur18g01090  
tetur36g00420  
tetur11g03130  
tetur08g07670  
tetur01g09180  
tetur07g06790  
tetur01g16110  
tetur12g02600  
tetur09g01030  
tetur11g01100  
tetur11g02600  
tetur19g01870  
tetur29g00350  
tetur07g00950  
tetur34g00240  
tetur09g02990  
tetur02g12070  
tetur01g03020  
tetur39g01630  
tetur19g05270  
tetur01g13830  
tetur20g03080  
tetur29g03270  
tetur02g03940  
tetur03g05800  
tetur09g03340  
tetur05g00810  
tetur04g00320  
tetur01g01890  
tetur32g01390  
tetur17g02640  
tetur17g01750  
tetur24g00000  
tetur39g00520  
tetur07g00030  
tetur02g02990  
tetur01g01600  
tetur04g00970  
tetur29g02580  
tetur11g04800  
tetur01g01560  
tetur32g01950  
tetur22g00570  
tetur01g12650  
tetur02g09660  
tetur03g08660  
tetur09g04370  
tetur04g02730  
tetur13g00160  
tetur29g13280  
tetur15g03610  
tetur11g01940  
tetur36g00460  
tetur15g02270  
tetur09g04800  
tetur19g01540  
tetur09g01320  
tetur04g08350  
tetur19g01970  
tetur01g12770  
tetur04g05170  
tetur49g00160  
tetur03g04900  
tetur08g04900  
tetur29g02720  
tetur11g05920  
tetur29g01820  
tetur04g08600  
tetur04g01460  
tetur01g01260  
tetur03g03990  
tetur08g01710  
tetur03g08200  
tetur10g00950  
tetur06g04280  
tetur24g01340  
tetur19g04990  
tetur13g02940  
tetur01g02740  
tetur39g02740  
tetur01g16220  
tetur27g00040  
tetur14g03020  
tetur39g08280  
tetur03g05220  
tetur08g06590  
tetur17g01790  
tetur02g13510  
tetur05g05810  
tetur12g02630  
tetur29g02980  
tetur29g01080  
tetur01g01470  
tetur09g05800  
tetur12g02550  
tetur49g00350  
tetur19g00560  
tetur01g13380  
tetur06g04440  
tetur04g06240  
tetur08g06840  
tetur19g02760  
tetur19g04570  
tetur03g02300  
tetur01g08330  
tetur02g09210  
tetur01g05210  
tetur09g15290  
tetur11g03190  
tetur07g01420  
tetur09g01570  
tetur02g12030  
tetur02g08700  
tetur21g01440  
tetur01g10840  
tetur19g00690  
tetur09g00130  
tetur26g00170  
tetur18g02920  
tetur01g02340  
tetur20g02540  
tetur01g06700  
tetur49g01000  
tetur39g01140  
tetur08g00440  
tetur16g02800  
tetur19g02530  
tetur02g05990  
tetur02g03990  
tetur04g03720  
tetur05g08490  
tetur01g02770  
tetur17g011570  
tetur15g00400  
tetur19g00740  
tetur04g00970  
tetur29g02580  
tetur11g04800  
tetur01g01560  
tetur32g01950  
tetur22g00570  
tetur01g12650  
tetur02g09660  
tetur03g08660  
tetur09g04370  
tetur13g00160  
tetur29g13280  
tetur15g03610  
tetur11g01940  
tetur36g00460  
tetur15g02270  
tetur09g04800  
tetur19g01540  
tetur09g01320  
tetur04g08350  
tetur19g01970  
tetur01g12770  
tetur04g05170  
tetur49g00160  
tetur03g04900  
tetur08g04900  
tetur29g02720  
tetur11g05920  
tetur29g01820  
tetur04g08600  
tetur04g01460  
tetur01g01260  
tetur03g03990  
tetur08g01710  
tetur03g08200  
tetur10g00950  
tetur06g04280  
tetur24g01340  
tetur19g04990  
tetur13g02940  
tetur01g02740  
tetur39g02740  
tetur01g16220  
tetur27g00040  
tetur14g03020  
tetur39g08280  
tetur03g05220  
tetur08g06590  
tetur17g01790  
tetur02g13510  
tetur05g05810  
tetur12g02630  
tetur29g02980  
tetur29g01080  
tetur01g01470  
tetur09g05800  
tetur12g02550  
tetur49g00350  
tetur19g00560  
tetur01g13380  
tetur06g04440  
tetur04g06240  
tetur08g06840  
tetur19g02760  
tetur19g04570  
tetur03g02300  
tetur01g08330  
tetur02g09210  
tetur01g05210  
tetur09g15290  
tetur11g03190  
tetur07g01420  
tetur09g01570  
tetur02g12030  
tetur02g08700  
tetur21g01440  
tetur01g10840  
tetur19g00690  
tetur09g00130  
tetur26g00170  
tetur18g02920  
tetur01g02340  
tetur20g02540  
tetur01g06700  
tetur49g01000  
tetur39g01140  
tetur08g00440  
tetur16g02800  
tetur19g02530  
tetur02g05990  
tetur02g03990  
tetur04g03720  
tetur05g08490  
tetur01g02770  
tetur17g011570  
tetur15g00400  
tetur19g00740  
tetur04g00970  
tetur29g02580  
tetur11g04800  
tetur01g01560  
tetur32g01950  
tetur22g00570  
tetur01g12650  
tetur02g09660  
tetur03g08660  
tetur09g04370  
tetur13g00160  
tetur29g13280  
tetur15g03610  
tetur11g01940  
tetur36g00460  
tetur15g02270  
tetur09g04800  
tetur19g01540  
tetur09g01320  
tetur04g08350  
tetur19g01970  
tetur01g12770  
tetur04g05170  
tetur49g00160  
tetur03g04900  
tetur08g04900  
tetur29g02720  
tetur11g05920  
tetur29g01820  
tetur04g08600  
tetur04g01460  
tetur01g01260  
tetur03g03990  
tetur08g01710  
tetur03g08200  
tetur10g00950  
tetur06g04280  
tetur24g01340  
tetur19g04990  
tetur13g02940  
tetur01g02740  
tetur39g02740  
tetur01g16220  
tetur27g00040  
tetur14g03020  
tetur39g08280  
tetur03g05220  
tetur08g06590  
tetur17g01790  
tetur02g13510  
tetur05g05810  
tetur12g02630  
tetur29g02980  
tetur29g01080  
tetur01g01470  
tetur09g05800  
tetur12g02550  
tetur49g00350  
tetur19g00560  
tetur01g13380  
tetur06g04440  
tetur04g06240  
tetur08g06840  
tetur19g02760  
tetur19g04570  
tetur03g02300  
tetur01g08330  
tetur02g09210  
tetur01g05210  
tetur09g15290  
tetur11g03190  
tetur07g01420  
tetur09g01570  
tetur02g12030  
tetur02g08700  
tetur21g01440  
tetur01g10840  
tetur19g00690  
tetur09g00130  
tetur26g00170  
tetur18g02920  
tetur01g02340  
tetur20g02540  
tetur01g06700  
tetur49g01000  
tetur39g01140  
tetur08g00440  
tetur16g02800  
tetur19g02530  
tetur02g05990  
tetur02g03990  
tetur04g03720  
tetur05g08490  
tetur01g02770  
tetur17g011570  
tetur15g00400  
tetur19g00740  
tetur04g00970  
tetur29g02580  
tetur11g04800  
tetur01g01560  
tetur32g01950  
tetur22g00570  
tetur01g12650  
tetur02g09660  
tetur03g08660  
tetur09g04370  
tetur13g00160  
tetur29g13280  
tetur15g03610  
tetur11g01940  
tetur36g00460  
tetur15g02270  
tetur09g04800  
tetur19g01540  
tetur09g01320  
tetur04g08350  
tetur19g01970  
tetur01g12770  
tetur04g05170  
tetur49g00160  
tetur03g04900  
tetur08g04900  
tetur29g02720  
tetur11g05920  
tetur29g01820  
tetur04g08600  
tetur04g01460  
tetur01g01260  
tetur03g03990  
tetur08g01710  
tetur03g08200  
tetur10g00950  
tetur06g04280  
tetur24g01340  
tetur19g04990  
tetur13g02940  
tetur01g02740  
tetur39g02740  
tetur01g16220  
tetur27g00040  
tetur14g03020  
tetur39g08280  
tetur03g05220  
tetur08g06590  
tetur17g01790  
tetur02g13510  
tetur05g05810  
tetur12g02630  
tetur29g02980  
tetur29g01080  
tetur01g01470  
tetur09g05800  
tetur12g02550  
tetur49g00350  
tetur19g00560  
tetur01g13380  
tetur06g04440  
tetur04g06240  
tetur08g06840  
tetur19g02760  
tetur19g04570  
tetur03g02300  
tetur01g08330  
tetur02g09210  
tetur01g05210  
tetur09g15290  
tetur11g03190  
tetur07g01420  
tetur09g01570  
tetur02g12030  
tetur02g08700  
tetur21g01440  
tetur01g10840  
tetur19g00690  
tetur09g00130  
tetur26g00170  
tetur18g02920  
tetur01g02340  
tetur20g02540  
tetur01g06700  
tetur49g01000  
tetur39g01140  
tetur08g00440  
tetur16g02800  
tetur19g02530  
tetur02g05990  
tetur02g03990  
tetur04g03720  
tetur05g08490  
tetur01g02770  
tetur17g011570  
tetur15g00400  
tetur19g00740  
tetur04g00970  
tetur29g02580  
tetur11g04800  
tetur01g01560  
tetur32g01950  
tetur22g00570  
tetur01g12650  
tetur02g09660  
tetur03g08660  
tetur09g04370  
tetur13g00160  
tetur29g13280  
tetur15g03610  
tetur11g01940  
tetur36g00460  
tetur15g02270  
tetur09g04800  
tetur19g01540  
tetur09g01320  
tetur04g08350  
tetur19g01970  
tetur01g12770  
tetur04g05170  
tetur49g00160  
tetur03g04900  
tetur08g04900  
tetur29g02720  
tetur11g05920  
tetur29g01820  
tetur04g08600  
tetur04g01460  
tetur01g01260  
tetur03g03990  
tetur08g01710  
tetur03g08200  
tetur10g00950  
tetur06g04280  
tetur24g01340  
tetur19g04990  
tetur13g02940  
tetur01g02740  
tetur39g02740  
tetur01g16220  
tetur27g00040  
tetur14g03020  
tetur39g08280  
tetur03g05220  
tetur08g06590  
tetur17g01790  
tetur02g13510  
tetur05g05810  
tetur12g02630  
tetur29g02980  
tetur29g01080  
tetur01g01470  
tetur09g05800  
tetur12g02550  
tetur49g00350  
tetur19g00560  
tetur01g13380  
tetur06g04440  
tetur04g06240  
tetur08g06840  
tetur19g02760  
tetur19g04570  
tetur03g02300  
tetur01g08330  
tetur02g09210  
tetur01g05210  
tetur09g15290  
tetur11g03190  
tetur07g01420  
tetur09g01570  
tetur02g12030  
tetur02g08700  
tetur21g01440  
tetur01g10840  
tetur19g00690  
tetur09g00130  
tetur26g00170  
tetur18g02920  
tetur01g02340  
tetur20g02540  
tetur01g06700  
tetur49g01000  
tetur39g01140  
tetur08g00440  
tetur16g02800  
tetur19g02530  
tetur02g05990  
tetur02g03990  
tetur04g03720  
tetur05g08490  
tetur01g02770  
tetur17g011570  
tetur15g00400  
tetur19g00740  
tetur04g00970  
tetur29g02580  
tetur11g04800  
tetur01g01560  
tetur32g01950  
tetur22g00570  
tetur01g12650  
tetur02g09660  
tetur03g08660  
tetur09g04370  
tetur13g00160  
tetur29g13280  
tetur15g03610  
tetur11g01940  
tetur36g00460  
tetur15g02270  
tetur09g04800  
tetur19g01540  
tetur09g01320  
tetur04g08350  
tetur19g01970  
tetur01g12770  
tetur04g05170  
tetur49g00160  
tetur03g04900  
tetur08g04900  
tetur29g02720  
tetur11g05920  
tetur29g01820  
tetur04g08600  
tetur04g01460  
tetur01g01260  
tetur03g03990  
tetur08g01710  
tetur03g08200  
tetur10g00950  
tetur06g04280  
tetur24g01340  
t

**Supplementary Table S1** - Number of strand-specific paired-end Illumina reads and their mapping rates against the *T. urticae* annotation for all treatments (CON, DEF, DEM, CsA, PBO and FORM).

**Supplementary Table S2** - Differentially expressed genes (absolute fold change (FC)  $\geq 1.5$  and Benjamini-Hochberg adjusted p-value  $< 0.05$ ) between adult *T. urticae* females of the JP-R strain treated with PBO compared to adult *T. urticae* females treated with formulation only.

**Supplementary Table S3** - Differentially expressed genes (absolute fold change (FC)  $\geq 1.5$  and Benjamini-Hochberg adjusted p-value  $< 0.05$ ) between adult *T. urticae* females of the JP-R strain treated with DEF compared to adult *T. urticae* females treated with formulation only.

**Supplementary Table S4** - Differentially expressed genes (absolute fold change (FC)  $\geq 1.5$  and Benjamini-Hochberg adjusted p-value  $< 0.05$ ) between adult *T. urticae* females of the JP-R strain treated with DEM compared to adult *T. urticae* females treated with formulation only.

**Supplementary Table S5** - Differentially expressed genes (absolute fold change (FC)  $\geq 1.5$  and Benjamini-Hochberg adjusted p-value  $< 0.05$ ) between adult *T. urticae* females of the JP-R strain treated with CsA compared to adult *T. urticae* females treated with formulation only.

**Supplementary Table S6** - Differentially expressed Major Facilitator Superfamily (MFS) genes (absolute fold change (FC)  $\geq 1.5$  and Benjamini-Hochberg adjusted p-value  $< 0.05$ ) between adult *T. urticae* females of the JP-R strain treated with CsA compared to adult *T. urticae* females treated with formulation only.

**Supplementary Table S7** - *T. urticae* genes coding for transcription factors with an absolute fold change  $\geq 1.25$  in both the PBO and DEF treatment and with an opposite direction of fold change compared to the CsA and DEM treatment.

**Supplementary Table S8** - Primers used in this study.

| Primer             | Sequence (5'-3')            | Tm(°C) | Reference  | Description                                   |
|--------------------|-----------------------------|--------|------------|-----------------------------------------------|
| tetur06g04520_F    | AAATACCGAGGTCGGACGTA        | 59.45  | (1)        | Cytochrome P450 - CYP392A16                   |
| tetur06g04520_R    | AAGCACTTTTCAATCTGGTCAC      | 59.69  | (1)        |                                               |
| tetur13g04550_F    | CTGGCAAGCCAATGCTTTA         | 59.96  | (1)        | Intradiol ring-cleavage dioxygenase           |
| tetur13g04550_R    | ACCTCTGAGGAATCTTTCACCA      | 60.11  | (1)        |                                               |
| tetur01g02650_F    | CCGTCAATGTGTTAATTCAGCA      | 58.58  | This study | Immunoglobulin E-set                          |
| tetur01g02650_R    | TGTACGGAGACAGTTGGGTT        | 58.58  | This study |                                               |
| tetur09g06670_F    | ATTTGATCATGGAAGTGTGGT       | 58.04  | This study | Protein midA homolog; mitochondrial precursor |
| tetur09g06670_R    | CCAGTGCATCATTGAGAGAAGT      | 58.39  | This study |                                               |
| tetur03g00830_F    | TTGCCTGGTGGTGGTGAA          | 58.99  | (2)        | Cytochrome P450 - CYP392A12                   |
| tetur03g00830_R    | ATGGTACTCTTCCAAGACCGATA     | 59.04  | (2)        |                                               |
| tetur03g00970_F    | TTGTTCAATTTAGCCAAGGTGTT     | 57.39  | (2)        | Cytochrome P450 - CYP392A11                   |
| tetur03g00970_R    | CCACTTGGTTGCTTCTCTC         | 57.37  | (2)        |                                               |
| tetur11g05010-20_F | CAGTGCCAAGGAAAATGCTG        | 57.93  | This study | Hypothetical protein                          |
| tetur11g05010-20_R | TGCGAACAATCAGTCCCAG         | 57.77  | This study |                                               |
| tetur40g00030_F    | GTTACATGATTGGCGGAGTAGT      | 58.21  | This study | Major facilitator superfamily transporter     |
| tetur40g00030_R    | GCATAGATTGGATTGAATGTGGTG    | 58.47  | This study |                                               |
| tetur08g06890_F    | TGGATTATTGGGTGCTTTGACT      | 57.95  | This study | Solute carrier family 17                      |
| tetur08g06890_R    | GCAAAGTACCAATGAGATAAAATACAG | 57.28  | This study |                                               |
| tetur08g06870_F    | GTGGACTATTGGCTGCTTTATGT     | 59.05  | This study |                                               |

| Primer          | Sequence (5'-3')         | Tm(°C) | Reference  | Description                            |
|-----------------|--------------------------|--------|------------|----------------------------------------|
| tetur08g06870_R | TGATAACGAGTTGAAAAGTGCCT  | 58.61  | This study | Sodium-dependent phosphate transporter |
| tetur06g01700_F | CTAATGATTCACGACCATGACACT | 58.89  | This study | Glycoside hydrolase                    |
| tetur06g01700_R | CAGCTCATCATAATAGTGACCGAA | 58.47  | This study |                                        |
| RP49_F          | CTTCAAGCGGCATCAGAGC      | 62.19  | (1)        | Ribosomal protein 49                   |
| RP49_R          | CGCATCTGACCCCTTGA ACTTC  | 62.09  | (1)        |                                        |
| UBQ_F           | GTCTCCGTGGTGGAAATGC      | 58.11  | (3)        | Ubiquitin C                            |
| UBQ_R           | TTGGATTTGGCTTTCACG       | 54.50  | (3)        |                                        |

- (1) Dermauw, W. *et al.* A link between host plant adaptation and pesticide resistance in the polyphagous spider mite *Tetranychus urticae*. *Proc. Natl. Acad. Sci. U. S. A.* **110**, E113-22 (2013).
- (2) Khalighi, M. *et al.* Molecular analysis of cyenopyrafen resistance in the two-spotted spider mite *Tetranychus urticae*. *Pest Manag. Sci.* **72**, 103–112 (2015).
- (3) Demaeght, P. *et al.* Molecular analysis of resistance to acaricidal spirocyclic tetronic acids in *Tetranychus urticae*: CYP392E10 metabolizes spirodiclofen, but not its corresponding enol. *Insect Biochem. Mol. Biol.* **43**, 544–554 (2013).
